# Supplementary material for: Mindful Melody: feasibility of implementing music listening on an inpatient psychiatric unit and its relation to the use of as needed medications for acute agitation
Source: Springer Nature journal article supplement (doi:10.1186/s12888-021-03127-z), 2021-03-06
Supplement: MOESM1 [file 18937276]

# Additional file 1

Name \_\_\_\_\_

## MUSIC FOR AGITATION PROJECT

### Patient's Feedback Form

Please give to the patient at the end of 30 or less minutes listening to the music.

Music helped me to calm down:

| Strongly Disagree | Disagree | Undecided | Agree | Strongly Agree |
|-------------------|----------|-----------|-------|----------------|
|                   |          |           |       |                |
