# Supplementary material for: Mindful Melody: feasibility of implementing music listening on an inpatient psychiatric unit and its relation to the use of as needed medications for acute agitation
Source: Springer Nature journal article supplement (doi:10.1186/s12888-021-03127-z), 2021-03-06
Supplement: MOESM2 [file 18937276]

# Additional file 2

## MUSIC FOR AGITATION PROJECT

### Staff Feedback Form

Please complete at the end of your shift.

1. The project was relatively easy to implement:

|                   |          |           |       |                |
|-------------------|----------|-----------|-------|----------------|
| Strongly Disagree | Disagree | Undecided | Agree | Strongly Agree |
|                   |          |           |       |                |

2. The project helped the unit milieu to be more quiet:

|                   |          |           |       |                |
|-------------------|----------|-----------|-------|----------------|
| Strongly Disagree | Disagree | Undecided | Agree | Strongly Agree |
|                   |          |           |       |                |

3. The project helped the patient to calm down:

|                   |          |           |       |                |
|-------------------|----------|-----------|-------|----------------|
| Strongly Disagree | Disagree | Undecided | Agree | Strongly Agree |
|                   |          |           |       |                |

4. Comments:

---

---

---

---

---

---

---
